## Correction: Evidence for Diversity in Transcriptional Profiles of Single Hematopoietic Stem Cells

Carlos A. Ramos, Teresa A. Bowman, Nathan C. Boles, Akil A. Merchant, Yayun Zheng, Irma Parra, Suzanne A. W. Fuqua, Chad A. Shaw, Margaret A. Goodell

doi:10.1371/journal.pgen.0020159

In *PLoS Genetics*, vol 2, issue 9.

In the Materials and Methods section, under “Global single or minimal number cell PR-PCR”, the first-strand buffer was reported incorrectly as “20 mM Tris-HCl [pH 7.5], 100 mM NaCl, 0.1 mM EDTA, 1 mM DTT, 0.01% v/v NP-40, and 50% v/v glycerol.” The correct (5x) buffer should be: 250 mM Tris-HCl [pH 8.3]; 375 mM KCl; 15 mM MgCl<sub>2</sub>.

This buffer was also reported incorrectly in the Protocol S1. The second sentence under the heading “Global Single or minimal number Cell RT-PCR (GSC RT-PCR)” on the second page should be: “For 100 μL of lysis buffer, we combined 76 μL of RNase free water, 20 μL of first strand buffer 5x (250 mM Tris-HCl [pH 8.3], 375 mM KCl, 15 mM MgCl<sub>2</sub>), 1 μL of Prime RNase inhibitor (Brinkmann, Westbury, NY, USA), 1 μL RNase Guard (Promega, Madison, WI, USA), 0.5 μL of NP-40 and 2 μL of a fresh 1/24 dilution of stock primer mix.”

This correction note may be found online at doi: 10.1371/journal.pgen.0020201.

Published November 24, 2006

Citation: Correction: Evidence for diversity in transcriptional profiles of single hematopoietic stem cells. *PLoS Genet* 2(11): e201.
